# Supplementary material for: How to communicate evidence to patients
Source: PubMed Central journal article supplement — Drug Ther Bull. 2019 Jul 25;57(8):119–24. doi: 10.1136/dtb.2019.000008 (PMC6678057; doi:10.1136/dtb.2019.000008), 2019-07-25
Supplement: dtb.2019.000008supp002.pdf [file dtb.2019.000008supp002.pdf]

From: "bmj.permissions" <bmj.permissions@bmj.com>  
Subject: Re: Permission to reproduce figure  
Date: 14 May 2019 at 08:28:15 BST  
To: Alexandra Freeman <af621@cam.ac.uk>

Dear Alex

Thank you for your email. BMJ is able to licence this content and therefore you are free to reuse it in another BMJ journal. Please ensure the material is attributed to the original author.

Best wishes

Laura

On Wed, 8 May 2019 at 13:02, Alexandra Freeman <[af621@cam.ac.uk](mailto:af621@cam.ac.uk)> wrote:  
Hi. I am submitting an article (commissioned review) to *Drugs & Therapeutics Bulletin* and would like to reuse a figure from a Letter to BMJ:

Smith AF. Discussion of risk pervades doctor-patient communication. *BMJ* 2002;325:548. doi:<https://doi.org/10.1136/bmj.325.7363.548>

Could you let me know how to obtain permission, please (I see it may have originally been published in another journal).

Thank you,  
Alex

\*\*\*\*\*

Dr Alexandra Freeman  
Executive Director  
Winton Centre for Risk & Evidence Communication,  
Centre for Mathematical Sciences,  
Wilberforce Road,  
Cambridge CB3 0WA  
UK

+44 (0)7712 431527

\*\*\*\*\*

BMJ is a healthcare knowledge provider with a vision for a healthier world. We share knowledge and expertise to improve healthcare outcomes. This email and any attachments are confidential. If you have received this email in error, please delete it and kindly notify us. If the email contains personal views then BMJ accepts no responsibility for these statements. The recipient should check this email and attachments for viruses because the BMJ accepts no liability for any damage caused by viruses. Emails sent or received by BMJ may be monitored for size, traffic, distribution and content. BMJ Publishing Group Limited trading as BMJ. A private limited company, registered in England and Wales under registration number 03102371. Registered office: BMA House, Tavistock Square, London WC1H 9JR, UK.
